# Supplementary material for: Monodelphis domestica as a Fetal Intra-Cerebral Inoculation Model for Zika Virus Pathogenesis
Source: MDPI journal article supplement (doi:10.3390/pathogens12050733), 2023-05-19
Supplement: s1 [file s1]

**Supplemental Figure S1. In situ primer/probe sequences.**

**Zika NS5 Protein Forward:** (CGCATTGAAAGGATCCGCAG)

**Zika NS5 Protein Reverse:** (TCCTTCCTCCTGGTATGCGA)

| NS5                                                              | Probe | Sequence: |
|------------------------------------------------------------------|-------|-----------|
| CGCATTGAAAGGATCCGCAGTGAGCACGCGGAAACGTGGTTCTTTGACGAGAACCACCCATAT  |       |           |
| AGGACATGGGCTTACCATGGAAGCTATGAGGCCCCCACACAAGGGTCAGCGTCCTCTCTAATA  |       |           |
| AACGGGGTTGTCAGGCTCCTGTCAAAACCCTGGGATGTGGTGACTGGAGTCACAGGAATAGCC  |       |           |
| ATGACCGACACCACACCGTATGGTCAGCAAAGAGTTTTCAAGGAAAAAGTGGACACTAGGGTG  |       |           |
| CCAGACCCCCAAGAAGGTACTCGTCAGGTTATGAGCATGGTCTCTTCCTGGTTGTGGAAAGAG  |       |           |
| CTAGGCAAACACAAACGGCCACGAGTCTGTACCAAAGAAGAGTTCATCAACAAGGTTTCGTAGC |       |           |
| AATGCAGCATTAGGGGCAATATTTGAAGAGGAAAAAGAGTGAAGACTGCAGTGGAAGCTGT    |       |           |
| GAACGATCCAAGGTTCTGGGCTCTAGTGGACAAGGAAAGAGAGCACCACCTGAGAGGAGAGT   |       |           |
| GCCAGAGTTGTGTGTACAACATGATGGGAAAAAGAGAAAAGAAACAAGGGGAATTTGGAAAG   |       |           |
| GCCAAGGGCAGCCGCGCCATCTGGTATATGTGGCTAGGGGCTAGATTTCTAGAGTTCTGAAGCC |       |           |
| CTTGATTCTTGAACGAGGATCACTGGATGGGGAGAGAGAACTCAGGAGGTGGTGTGAAGGG    |       |           |
| CTGGGATTACAAAGACTCGGATATGTCCTAGAAGAGATGAGTCGCATACCAGGAGGAAGGA    |       |           |

**Supplemental Figure S2**

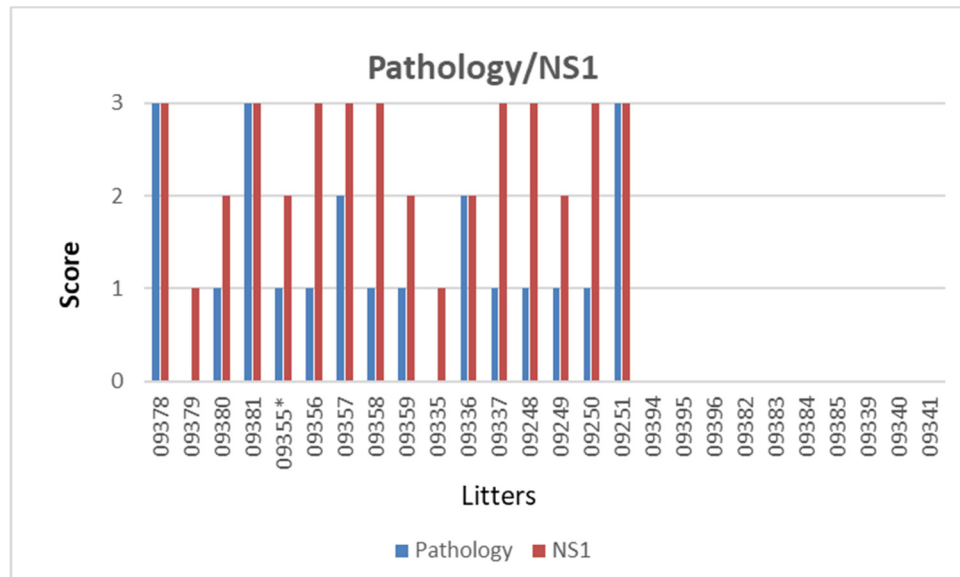

**Supplemental Figure S2. Pathology and NS1 brain scores from ZIKV-inoculated and PBS-inoculated laboratory opossum pups.** Blue bars represent pathology (scored from 0-3), and red bars indicate NS1 expression (scored from 0-3). The absence of a bar indicates a score of 0. The ten pups indicated to the right-hand side were injected with PBS. The \* denotes the growth-restricted pup, O9355.
